# Supplementary material for: The Genetic Network of Forkhead Gene Family in Development of Brown Planthoppers
Source: MDPI journal article supplement (doi:10.3390/biology10090867), 2021-09-03
Supplement: s1 [file s1]

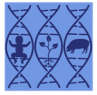

## Supplementary Materials: Figures S1–S6

>*NIFoxA*

CTGTTGCGGAGGTTATGTTGTGTTGTATAGACTGATTGATAGTGATAGTTTGAAGAATGACGATGTTGTCGCAAAAGT  
TGTACGCGGATTCCGGTGAGCAGTGCGATGGGCACGAACGCGCCCGGCTACGGAATGAACTCCATGATGAACTCGTGC  
TCACCTCAGGGTGCCTCAGGATTCAACATGCTACAAGGTTACGCCGCTATGGCCGGCCTCAACGGCAACTGTATGGG  
CGGGGGGACCATGGGCTATGGGGCACAGGGAGTAGGCTCGTCGTGTATGGGGCCCTACGGCGCGGCCCCACTCACCT  
CCAGGGCGGACGTCACCCCGTCGGCGCCTCCCGGTGAAGCCGCGTCACCTCCGCTCTGCAGAGAGCTCGTGCCGAC  
AAATCCTACCGGAGGAGTTACACGCACGCTAAACCACCCTACTCGTACATTTCGCTCATCACGATGGCCATCCAGAA  
TTCTCCCACCCGCATGCTCACACTATCAGAGATCTATCAGTTTCATAATGGACCTGTTCCGTTCTACAGGCAAAACCA  
GCTGCGGTGGCAGAACTCGATTAGGCATTCGTTGAGTTTCAATGACTGTTTTGTGAAGGTGCCGCGAACGCCGGACAA  
GCCGGGCAAAGGCAGCTTCTGGACGCTGCATCCCGAGTCGGGCAACATGTTTCGAGAACGGCTGCTACCTGCGGAGG  
CAAAAGCGGTTCAAGGACGAGAAGAAGGAGGCTGTGAGACAGACGCACAAGAGTGCGGTGAGTCCGTCGCACCAC  
GGACACCAAACACCGCACACGCAGCATCTGCACGACGAGAAGCTCAAGGAGAAGGTGGAGGACGTGGTTCTGCATG  
CGTCACACGTTGACCTGTGCTCGGCTGCCTCACAGCTGCACCAGCGGCAACAACAGTCGCATCACCAGCAAACAACA  
CAACAGCACACGACGAGATGGTCGCTGCCATGGTGGGACGTTGTTCATCCGCACCTGGCCGCTCCCTGCAGGTGCA  
GCCCGACACGCACTACCCTCACTCGCACCACCACCTGAAGCAGGAGTACCCCGCATCCAGCCACCCGTTCTCCATCA  
CCCGGCTGCTGCCCGCCGAGAGCAAGACAGACATCAAAATGTATGACATGTCCAGTATGGCTACAACGACTACTAC  
CAGAGCTCGCTCTACCACCCTTCGGCCGGCACCACCGCCTTGAGACAGTATCCGCTCGCCTAAGT

>*NIFoxB1a*

CGGATGATAGTGTGATTAGTTCTCGATAAGCATTTCATGGAACAGTTTTTCAGGGAGATTGGAAGTAGTTTTCTGAT  
GATAGTGTGACAATTTCCGACAAACATCCACGACCCTGTCTGTAATCGTACGGCGATCAGAAGCCTCCCTATTCCT  
ACATTCGCTGACCGCTATGGCGATATGGAGCTCGCCCGACAAAATGCTACCTCTCTCAGACATTTATCGTTTATCAG  
TGATCGATTTCCATACTACAGAAGAAACACACAACGCTGGCAAAATTCTCTGAGACATAATTTGTCGTTCAATGATTG  
TTTCGTGAAGATACCTCGGAGACCTGATAGGCCAGGGAAAGGCGCTTACTGGGCGTTACACCCGGCAGCGTTAGACA  
TGTTTGAGAAATGGATCGTTGTTAAGGAGACGTAAGAGGTTCAAACCTGATGAAATCTGACAAGGATAGATTGGAGAAC  
GAGTTGGCAGCGCTGGCGAACATGAATCGGTTCTGTTGCCCCCTCAACAGCCGCTCCAGCCGCCCAACCCCTC  
GCCCCCGGAGATGGTGCTTTCGGAGCCGCTCTCACTAGTTCTGAGCCGCTCCGAGACTTAAGCGCGACTTCACGAT  
TGCCAGCCTGATTTGCGCTGATAGACCAAGGCCTGCATGCTCACCACCTCCGGCGATACATGTGGTGCCCTGCTGTCC  
GCCGCTCCACCGCCTCTAGTCCTTCTGCCGCTCCAAGTCACGTGGCTCTCCCGCCGCCCCGGGGTACTTCATCAC  
CACCACCATCTACCGCCTCCAGTCACCATGTGTTGAGTTTGGGCCGACGTTGAGCGCGCTTGAACCTCCGAAACC  
TTCCAGAAAATCTGGTAAACAGTGATAATTATTTGTATTGTTAGTAAAGTTCCATTAGTCAAGTAAGTTAGCGTCTC  
AAGCT

>*NIFoxB1b*

GGAAACCTTTAATCCCTGAAAGGGACAATGCCACGACCCTGTCGTGAGTCGTACGGTGACCAAAAACCTCCCTATTC  
 CTACATTTCCCTGACCGCTATGGCGATATGGAGTTCACCCGAAAAAATGCTCCCTTATCAGACATTTATCGGTTTATC  
 AGTGATCGATTCCCATACTACAGGAGAAACACTCAACGGTGGCAAAATTCTTTGAGACATAATTTGTCGTTCAATGAT  
 TGTITTTATTAAATACCTCGCAGACCTGATAGACAGGGGAAAGGCGCTTACTGGGCGCTACACCCTGCAGCGTTAGA  
 TATGTTTGAAAACGGGTCGTTCCCTCAGGAGGCGGAAAAGGTTTAAATTGCCGAACTGGAGAATTTGGTGAAGAATT  
 CTTTCATCTGCCACCCCAAGGCCCCGAGGGACCTCTTCAAGCCCCCTGTGACTACCGAAGTTCCTAAGAGCGCC  
 GCCCCCAAGCCGTTCAGTATCGACAGCATAATTCGCCGTACCGCCCCAGCGAGCAATTGTGCAGCGCCCCCTGGG  
 GGGCCCCCTGCTGCCTCCGACCTACCAGCATCACCCCCCTGTTTGTCTGCCCCGGGCCCCGCTGTTGCAGCCCCCTA  
 CGCCGCCCTCTATGCCGCCGCTCTGCATGGATTGTTGGCTCCACCCCTTACCACCTTTTGCAGCCTCTCGATTGAG  
 GCCATGGCCAGGCAGCGGTTTCAGCATTTATCTGG

>*NIFoxC*

TCCACTGCTCCTCGTAGACGTACAATTTTTAGTGAATGTTATCGAGTCTCCTCCTCATCTTTATCTTGGAACGATG  
 CTGCACTGATGCTGCACTGCTCCCCCGGTCTCTGTAATCCGGCACCCGGGAACATCCGGGCGGCGGGCACCATGCA  
 TGCCTCTGTTTCGGCGACAGAACGCTATTACGGCCGACAGACCGGCTACGGACCCGTACCGGCCGGGCCCCGGACAC  
 AATCCGTACACCACCTACGAAAACCTACGCGGATACGGATATCCGGTCCCTATGCTCACCAACAGTCTCTCCACCA  
 TGGCCCGTCCAAAGACATGGTTAAGCCTCCTTACTCGTACATAGCTCTTATCGCAATGGCTATACAGAATGCACCTGA  
 TAAACGGTGTACGCTAAACGGGATCTATCAGTTCATAATGGAACGGTTTCCGTACTACCGCGAGAACAAAGCAGGGAT  
 GGCGAAGCTCCATCAGGCATAATTTGAGTCTCAACGAGTGTTTTGTCAAGGTGCTGAGAGACGACAAAAAACCAGGC  
 AAAGGCAGCTACTGGACACTGGACCCTGACTCCTACAACATGTTTCGACAACGGCTCCTACCTGCGTCGCCGGCGACG  
 CTTCAAGAAGAAGGACGCC

>*NIFoxD*

GTAATGTTGTTGACAGCGTCAGTGGCTCCCATGTGCGTCGCCATGCAAGACCGACATCACCGCTACGAGGTGACGCC  
 GCTCGATCTGCGACCCGCCGTACGACGCCACCGCACTCCGACGACATGGACGAAATGGACTCCGACGAGGATATC  
 AACGTGGACTCGGATGGTGAGCCCGACTCGCGACTCCTCGGCTCGGATGCCCTCGACTTCCATCGCCGCTACATGCA  
 GCAGCAAGCACAGCCGGGTGACGACTCTCCCGGTGCGCGTCACGCGGAGGCGATGACTCCTGCTCCACTGACAAG  
 AAGTCTTCGTCGTCGTCTAGTGAAGCCGCCCTACTCGTACATTGCTCTGATTACGATGGCCATCCTGCAGTCGCCGC  
 ACAAGAAGCTGACGCTCAGCGGTATTGTGAGTTTATAATGACACGTTTTCCGTACTACCGTGAAAAGTCCCCGCCT  
 GGCAGAATTCTATCAGACATAACCTGTCACTCAACGACATAACCTGTCACTCAACGATTGTTTCATTAAGATTCCACG  
 TGAACCGGGAATCCAGGGAAAGGTAATTACTGGACCCCGGACCTATGGCGGAGGATATGTTGACAACGGCAGT  
 TTCCTGCGTAGGAGGAAACGGTACAAGCGACAACCGCCGACTTTCTGTTGCGGGACCCGCACGCAGCTATGGCTTT  
 CCTGGCACACCCGACCGCTTCAACCGCTGCATCCTCACACGTTCACTACCCATATCTGTGCGCGCTGCCTCCAGC  
 CGTGCTCTCCTGCTCCCGCTGAACCTGCCCCGCTCTCGCTCGGACTCAACCTGCTCTCGTCGTCAGGGCCGCCCCG  
 ACGTCTCTCCCTTGCAAGCCGGTCCCAGTGCAGGCGGCACCTCGCTCAGCAGCCGGCTTCAGCATCGACTCCCTCATC  
 GGCAAGAACCCTCGCCGAACAAGCCTTCGCTTCCGCCGCTCCACCGCCTCATCTCTCGCAGCACTTCACCCACCTG  
 CCGACCTCATCGCCGCCCGCCGTCTCCCGAGCATCGAGTCGGCTTTCACGCCCTGGCGGCCGCGCCTGGGCCAG  
 GTGAGTGAACGGGCTCACGCTGCACCCACCTTATCACTCCTAG

TTCTCGTGTGTTGATACTCGCGCTTGATAAATAAAAAACGAAAATGTA AAAAATACAGGAACGTACAACAGTCCA  
GTACCGACACGGGACCCCTCGCAGTACCATGGAGTGCTCCATCAAAGCATCAACATCCAGCAACACCTCACTCATCT  
ACACCTTCACGCGTCTTTACCTTCCCTGCAGGGATCCACAGGATCCAACCCAGGCCTACCATCCACCAACTACGAGC  
GACCTCAGCCAGACTCGATCATTGTGGAACCCACGTCAGCATCCTCTCAGCTCACCAAGAATGGCTCTCCCCGAAA  
CCAGCAACCCGAAGACCCGAAAAGCCGCGATACTCGTACATTGCTCTCATCAATGGCCATTCAAAGCTCCGACAC  
CAAACAGATGAGACTCAGTGAGATCTATGATTACCTGCAGCAGCGATTGAGTCTTCCGCGGAGCCTACACTGGCT  
GGAAGAATTCCGTGCGACATAACCTCAGTCTCAACGACTGTTTTATCAAGGTGGATAAGTCGGTATCACGGCCGTCCG  
AAAGGCCACTACTGGAGACTGCGCCACGACTGCAACATCCTGGAAAACGGCTCGTTCAGCGCAGACGTCGCGGCA  
CCGGTCGCAAAAAGCCCCCTGCGGGCCCCCGGGGGCGTCCAGAAGGGGGTGCTGCCAATGCAGCTCTTCCCCTGC  
AGCGTGGAACCCCGCTGATCGCATCAGCTCCTCGCCCTCCACCGCCATCTTGACTATCAACACCCGCACCCGCATTCA  
CATCACCATCACCATCATCATCAGCAGCAGCAGGCGCTCTATCAGCACCTACCGACCGCCAGTGGCGGCTATCAAGT  
ATTTCAGAGCCCTTACGAGCAACTGCACCAATACTCTACTGCAGGCTACCCAGATCCCACAGCACAGCTGTCTTTGCA  
ATGGTCCGCGCCGAAAACAATTTGACTGCCTGGCAGCCTACAATAACGCGGCCTACAACAATTCCAACAGCACCT  
CACACCTGACACCATGGACAATGGTTTCAGGGAGAGAAAGCCGTTTGACCCCTCACGCCTTCTCCCCCTCCCTTAA  
CGCCCGCTTTTGCAGTTGCTGCCACTTATGGCAGAGGTCAAATGAATCCAAGCATTCAACAGTACGAGATGATCAAG  
GATTACAAGGATTACCATGATCAAGCAGGAAAAACTGTCTTCAAATGTGAACTTTTTAGAGTAAGATTCAAGTAA  
CGTTCAAATAGAACTATTAAGATATAAGAATAAAACTAAAATTTAGGAACATTTTATATGAAAGTGCAGGATTCA  
ATGCTGTTCAAC

TCAGTTCGAGAGGATATTCGAAATTAAATTCTCTCCAAGTGCAGTTTCTCTCTGTGTGTGTACGAAGTCCCATAGAGT  
CACAGTGGAGGAAAACAGTATGGTGAAGATAGACATTATCGAAAACCCCATAAATGGCCCGTACGCCCTTTAAAATCA  
TCGTTCAGTATCAGTTCCATTCTCCCAGAGACGGCCAGTCGACCACCCAGTCCGCTGTCATCACCTGGCATCAGTTCC  
TCGGCGGAGATGAGCGACGTAGACGTGGAATCCGATCTGGATGTAACGGGGGATGGAGATACACCGCCACCCCTCG  
ACTGCACCCTGTCTCTCACCGAAAGGAGAAGGTAAAGACGGGAAGACGACTGTCGAAAATGGGAAGACAAATG  
AGGAGAAGAAGAAAAACGAGAAGCCACCCTACAGTTACAACGCGTTAATCATGATGGCGATCAGACAGAGCCCCG  
AGAAGAGGTAACTTTGAACGGAATCTACGAATACATCATGAGGAATTTCCCGTACTACCGTGACAACAAACAAGGC  
TGGCAGAACTCCATCAGACATAACCTCAGTTTGAACAAATGTTTTGTGAAAGTACCTCGCCATTACGACGACCCCGGT  
AAAGGCAACTACTGGATGTTGGACCCCAGCAGTGAGGATGTGTTTCATCGGAGGTACCACGGGGAAGTTGAGGAGAA  
GGTCGACCGCAGCCTCCAGGAGTCGCCTGGCAGCCTTCAAGAGGACGGTCGTCTGGGAGCGGCAGGTCTCTACCCG  
GGGCACCAGGAGGCCCTTCACGAATCCCGCGGGATGGGGGATATCACCTTGGGACAACCTCTACTGCAACCCGG  
CTGCCTTGTAACATCGTTACCCGGGTACCCATACCCTGGACTTCTACAACCTCTACCAAACCGACACCCATCCCCG  
CACATGCGTTCTCCATGGAGCGACTCTGGGTGACACCACGACGAGCACCCCGACCCCTAGTGGAACGCCTCCAGCT  
TCTATCGCCCTCAGACCCTCCGTGTATCTCCCGGGTACCAGGACATCTACGCCACCCTCAGGCATCACCAGCAGATG  
GTGGCGCGCAGTTTACAACACCAGACGCAACCTCCAGTTACGACCTCGGCCTCCTCTAGTCTTGAGCCTCCACGGAG  
CCTCTTCAAGCCTGTACACCGTCTCACACCCCGGCCCTCCAGCTAGGATACTCGTTCATCTGTAAGTCGTTGCTAT



## &gt;NlFox11

TAGCGACGAAGACCAATGCAGCAATGACCATCAAATCTGTCAGCCTACAAACGATGAAGACCGATGCGGGAAC  
 GGCCATCAACTGATTCTGCAGCCTATAAAAGACGAAGACCGATGCGGCAACGACCATAAACTGATTCCGCAGCCAG  
 CTAGCGACGAAGACCGATGCGATCTCACCAGTCTCCACTGGTTGACCAATCAGACCTCTCAACAGCTGTGTCTCT  
 CACTCCCCACGCCTCCCAATTCTCCCTCCACGCGCACACACCCTCTCACTCACTCGCCAAGGCCGCCAACGGACATA  
 AGGCCGCACAGACTCTAAGGCTGACACTCAATCCAGCTGTGCGCAAGACTACAACTGAGCGGGGATCACAAGCC  
 GCCATTTTCGTATGCCACCCTCATCTGTATGGCTATGAGGGCCAACAATAAAGATGACCCTATCTGCCATCTATGC  
 ATGGATCAGGGATAACTTCTTTACTACAGGAACGCTGATCTACATGGCAGAACTCGATAAGACACAACCTATCTC  
 TGAACAAGTGCTTTGTAAAAGTGCTCGGTCAAGGGACGAGCCTGGTAAGGGAGGATTCTGGAAGCTGGACTTGGAT  
 CGTCTGGAGGAAAGAGCTCATGGTTATGACGTCACCGTCAGATCCTCCCCTCACGCCGCCAAACCAGCCACCAGTCAG  
 CGAAAGCCCCCTCTACAATCATGCCGCTCCCTCGTAACCCTCAACCTTACCAACTTGAACATGACTGTGGAAGCAT  
 TCTGCCAACATTCCAACTGAGACGTGTTTCGCTGAAGATGAGTTGGTAACCTGCTTGTGGGTAATGGCGGGTGGGA  
 TGATTCTCAACTCGAGCTCTTGCACTCTCTTAGATACTATTAGATGTTTTAGTTATTTTCATTTTCGAACAAGAAT  
 TTGACTCTCAACTATGGTTGAGTTAAAAGTCTTCCGACTTGAAGGGATATGCGGAGCATAGAACAGTAGGGATACA

## &gt;NlFox12

CTCTAGTTGAAAGTAGGGTATCACCAGTTTTTGAAGTTATGTGGATTATGATGACGAGAAAATAGTTAGAACTAAA  
 TTCACAATCAGGGTGTGGCATGCTAGCAGCATCAGGTGATGCCGATCTAGCCGGCGTTCGCACCGCGACCTGTGAT  
 TGGCTCAACTCTCCCCACCCTTCTGCACACCCTCTCCGCCATCCCCGGCATCTCTGCTCCTCTCCACTCTCAACTC  
 TCCCTCCACCTCCACCATCACCAGCTCTCCTCTCCACACCCTCTCCACCCTCTCCTCCTCGTCGGCCTCGCAGCGA  
 CAGTCGCGCGATGGAAGCCGCCCTACAGTTATGCAAGTTTGATACGCCTGGCCATTAGTAAGTCACTGTCAGGGAAA  
 AATGACGCTATCCGAAATTTACCAATTCATACATAACAGTTCCCTTACTACAGAGACGCCAGCACCGGCTGGAAGA  
 ACTCGATCCGGCACAACCTGTCTCTGAACAAGTGCTTCACAAAAGTGGCCCGACCCAAGGACGACCTCGGGTAAGGG  
 TAGCTACTGGGCCATAGACCACACTCACAGCCAAGATGGCGGCGGACAACAAGATGGCGGCGTCCCACGCAAAAAG  
 GTCAAGCTGCCAGGGTATCTCCCTACAGCCCAGAATGTAACAGTAACAGCAGTGATGGTAGATTAACATTGAAGAT  
 GGCCAGAAGCAGTACAACCTCAACCCCTAGTGAAAAGTGTACAGTTTGGATGAGTTCAGCCTGGGAGACAGCAAA  
 GAGGTGTGAGCTGTCAATTTCCAACTACTCTCCACTATGGTGTGACCCTAGTGACAGTCAGAGTGACTACCAGCCT  
 TGCCAAACCGACTTCCAGGAGAAGAGTGACTACCAGGGCTGTGAGACTGACTACCAGGCTAACAGAAGTGGTGCAT  
 CATCGTCTCATCCGACTACTTTTATCCACACCTGACACCAATTTGGAACCTTCCAAAACTACTACCAGGAGTTTCC  
 ACAGTTGGTTCGACAACAACAGTGTGCCAACACTCTGCCAACTACAGTGAAAAGTCAAGGTATGCTGCAGATGTGC  
 CCAATATGGCAGATGAAAGTCTGAGGTATGGAGTGGGAGAGAGTGCTTCAAGGTATGGAAGTAGTAGTAATAGGAG  
 TATAGAGGAAAATAGTTTCAAGTACAACAATTTAGCCCATACAAAGCCTCGAATAATTTGAATCAGGTAGTTCTA  
 GTAGTTGTTATTACAATAATCATCAACAAAACCAAACTCCGATTACTATTACAGTGGGTTGAAATCAACTTCCTATG  
 AGTATATAAGGGTGAATGAGGAGGATAGATGTGGCAGTGCAGGGGACATTATGTGGGAAACAATAACAAACCAGT  
 GTTGCCAGAGGGAAATGTGGCAACGTTTGAGACTGGCGCCCAACGTGGGACCACAGCGCCTTCTATTGGTCGTCGC  
 CAGCCACCGACCAATCATGTCTCGCTCGCCCTACTGTGCAATCCGGCTCCCCATTGGCCACGGCTCGGCCAATGGCGAG  
 GCGTCTCTGTCCCCCACTACAACCAGATGGCGCCTGATTTGAATGGTGCAATGATGGCGTCTTCTTTGATTTCGGCG  
 CCAATTCAAAATGGGACACTTTGTTATCAACGTTTGTGTTAGTAAACAAAAGTCCCGTGTAAGTAAATCAAT  
 TTGTAGGTTAGTATAATTAATGTGAGAGATTGATTGATTACATACATTGCAAGGGAGAGTAAAATGGGTGAATAATCTT  
 GATATTATGCAAATAGATTTTGTCTTGTCTAACTACCTCG

>*NlFoxK*

GACTGTGAAGACGTAATGTC CGCACATTACGGTCTCAAGAGAGCGATGCATGGGCTCTTTAGCCCTAAAATCAGC  
 TCCTTCGAGTCCAGCAAAGCTACAATGGAACCCAGATAATAAACTACGCCGATTGCAAGATTAGAAGGTCGTGAAT  
 TTGAGTATATGGTTAGGCAGAAACGAATCATTATAGGACGAAATAGCTCACGAGGCGAGGTCGATGTAAACATGGG  
 ACATTCAAGTTTTATTCTCGAAAACATCTTGAATTGTTTTTGAACATCCTAATTTCTTCATGGTTTGTAATGGAAAA  
 ATGGAGTTTTTCATCGATGGTGTGTTCAACGAAAAGGAGCTCCAGCATTGCAACTAGCAAAATCATGCACGTTTCAGAT  
 TTCCGAGTATGCCGATCCGCCTAGTGTTCAGTCTCTGGTGGACGAAGCTGACCCCCCGCTGCACGTCCCGCTCCCG  
 CCAAGCAGCGACCCCCACTACCTCCGTTGCGGATCAACATACCTGAGCCAGGTGCCAACTTCACCAGTCCCTTCCCAT  
 CTCCCCTGGCACTATCAGTGC GGCGAACTCGTGCCCGCGAGTCCGCGGTGCGACGGGCCGCGTGGCAGTGGTTCG  
 AACATCACGTCCGACCTGCAGATGGTGGCCGCATATGCGGTGCGTCCGCGGGCCCAACTCGGTTCATCAACACTGT  
 CACCGTTTCACGTCCAACAATCTCGACGATCGAAACGAAATGCTTATAGATGGATCAAGCCAGCAGAACGACGAC  
 ATTCATCAGAATGATGGCAAGCTGTTCCGTCTGCGAACGGCTGCTCGTCTGATTACAACCCCCACCCAAAGAAGA  
 GACAAAGCCGCCGTACTCTTATGCTCAGCTAATCGTTCAA GCTGTGGCTCTGCCCCCGATAAGCAGCTTACTCTTAG  
 TGGTATTTACTCTTACATCACCAAAAACTACCCCTATTATAGAACAGCCGACAAAGGTTGGCAGAACTCTATCCGCCA  
 CAACCTGTCGCTGAACCGGTACTTTGTGAAGGTGCCGCGCAGCCAGGAGGAGCCCGGCAAGGGTTCGTTCTGGCGCA  
 TCGAGCCGCGAGTCCGAAGAGAAGCTCATTGAGCAGTCGTTTCGGAGGCGGCGACAGCGCGGTGTTCTTGTCTTAGA  
 GTTCCTTTTCGGCCTGTCATCGA GGTCCGGCGCCTGCTTCTCCA AGCCACGTGGGCATGAGTGGCTTAATGACGCCGAA  
 TCACTGTCCCAGAAAGGCTCTCCCACTCCCGACAGCACAGTCATCTCACCGGTGTCACAAGTCAGTCGGCGCCCCGG  
 ATCTCCAGGACATCCTGGTGTTACATTTGTGAGCACCAGTAATAACATCTCAGTGCCAAGCGGCAACATCGCAATGA  
 TTAACAAGTCACGCATTGTTTACGATGTCACTTTAGTCCCCAATGGCGACACTAGTAGAGAAGAAAAATACCTAACA  
 ACAGGCCACATGTCTGGAAGTAGCATGCTTAGTATAGCAGAAGAGCGTTCAATGTCTCCTCCAGTTATTGTTCAAGCC  
 GCATACACAGGGGCATTTGTTGGTGAGGGAGGCATGAAGCGGACCTTGACGATGGCGATGCTAACGAGAGTTGCG  
 GACCACCCGTCAAACAGCTACGA GAGAGCGATTCCGATACTGATCATTCA TAA TCTGTCATGACAAAGAAGAGTGC  
 ATTCGTAGTTGACAACTCCTGCAATGGCGGCATGCCGATGGCCGAGTGTGTGTGGCGCATGCCACCCAGTGACCAGT  
 GTAAACCGGACCTAGT TGTGTCTAGTGGCAGTG

>NI*FoxL1*

CAATCTTCGTTCAAGTGGAAAGGAGTCACGCGGGGAGATACCATAGAGTTTTTCATCGTAGGATTGGAAAATTATAAC  
 TGTCCGATTGAGTGCCTCAGAAAGTAAACGTTTTGGGAAAGGTAGTAATTTCTGAATCGGTGTTGGTTGAGGAGTTG  
 ATTAGGACAGCTGATGAATCGATGATGCTTCCAACCTCAACTGCCAGCGCATCGCAATCAGGTTTGGATCTGTCCATC  
 ACAGCCGGCTCTCAACCGTTTCAGCAGTCGGATCGCAGCCAATCTTCGAGTCCCGTCGAGGGTCAACATCAGTTGCTG  
 AGTCAGCAACAGATCTCGCCAGACTAGAGCAGCATCCAGGAGCCGCAGACCTCTCGACATCTGAGTCAGCGATAT  
 CGTCTTCGGCAGCCATGGACCTCCATCACCATTGCCTCCACACCTGGCGACCGCTTCCCCCTCCCTGCCACTCATCT  
 GCCTTATCTCTACCACTTACAACCTGCAGGCTCGGCTCCTGCCCTACATACATCAGCTGCAGATGTCTCACTTCAA  
 ACAGACAGCAGCTACAGCGAGCAGAGAGCGTCCCGAGAAAGCCACCCTACTCATACATAGCGCTGATAGCAATGGCG  
 ATCACTTCGGCGCCCAATCAGCGACTGACCCTGAGCGGCATCTACCACTACATCATCGAGCACTTTCCTACTACCGC  
 GACAACTGCCAGGGCTGGCAGAACTCGATCCGCCACAACCTCAGCCTCAACCCGTGCTTCGTGCGGGTGCCTCGCGA  
 AAAGGGCGAGGGCAACGGCAAGGGTAGCTACTGGACGGTTGATCCGGTCGCTGCCGCCAACATGTTTGAGCGAGGC  
 AACTATCGCCGGCGCAAGGCGCAGCGCAAGCCCCGGCGTCACGGGCTACTGTGCAACAGGTTACATCAAGTCCAG  
 AGGAGAGCGTCCGAGTCAAAGTAATTGAGAAGAAGCACTTGAAAAACAACGATAGTAATACGATAACAATTGAAAT  
 TGAAACAAATGAAGATGCAGCACCGTTGAAGAAGCCAAGACTCGCCAATGAATTTGCGTCGGAAACACGACTGCT  
 CCCTTACACCAGCATCGCGACTAGGCAAAACATCGATTTTCTAATCGAGAATCTCATGAAACCTGAGCCCAATAG  
 CAATTGCTCATCAGATGAGCATAGCATTGATTCTGTGAGGAATTCTACATGATATAAATAGGCTGTTGTGAGATC  
 A

>NI*FoxL2*

GTATTGTGGAGTGGTTGAGTGAGCTGTAACCTGTGGTTTCGAACATTGTGTTAAAGTGAAGCGTCAAATTTCAATCAT  
 CATAAGACGTCATGCTGTCTCATCTGCTCCAGACTCGCAGGATCTTGAAGACAATGAGCCTCTCAAATCAAAGAA  
 GAACCGTTCATACCCGTACCGCGGATTGCTCCAGCTCCACATTATGGCTACGACGACAAGAGCAGCGACAACGT  
 GAAGAGTTCTCCGTGCTCCTCCTCGTCACCGAGCAGCCACACCCATCAGCTGCAGCACAGAAGCAGCAGCAGCTGCA  
 GTGGAGGCAGCTCCGGCGACCATCACCTGCTCGCTCAGCTGCAGTCCACTGTCTCCTCCACTGATCTCATGCCCTACA  
 TCCACAGCCCCAGCCCCATCCAACACACCACCAGCAAGGAGTCCACTGTTGTTTCCACATCAAGCGGCTCCCCCTCG  
 CCGGAACAGTGGACTCGGACCCCTCGGTGAAGCCCCCTACTCGTACGTGGCTATGATCTTCTTCGCGATCAACCAA  
 TCGACCCTGAAGCGAGCCACCCTCGCAGAGATCTACAACCTACATCTCGACCCGCTTTCCTACTACGACAAGAACA  
 GAAGGGCTGGCAGAACTCCATCCGCCACAACCTGTCGCTCAACAAGTGTTCATCAGGGTGCAGCGGAGGGCGGA  
 GATCGCAAGTGCAGCTACTGGACGCTACACCCGAGCAGCGCGGATATGTTTGAGAACGGCAACTTCAAGCGTCGAC  
 GCCGTATGAAAAAGACGCCGTTGATGTCGGAGGCGGCTCTCCCTACATGAAGCAACTATACGCCGACTCGCCATAC  
 CACCCCCACAACCATGCGCCCCGCTCACCCACACCCCAACCTGTTCCACACGCAATCATCATGTC  
 CGTGCTGCTGCTGCTGCCGCCGCGCTTACGGCAGCCATTACACCAGCAGTACATGGCCAATGCAGCCTTCACAGTT  
 GACCTACCCATCTTGTGAGGGTATTGTTACTCGCAACGCTTCTCAGTATCCTATCCAATCTCAGTTGTCTGGACAGTTG  
 ATTCAACCTTTCAAATATCAAGTCAATTGAACAACAACCTACCAACTGAATCCTGGAATAAGTATGACCAGCAGTAG  
 TGAGTTCTCATCCTGCTCCATGAGAAGAACAGAGTCTGATTCTATGCGATATCCGTAAGTGGACATCTTCAGAAATGAA  
 AGATGAATCGCCGATCTCAATGAACAGCTCGCCAAGTGAAGCCCGTACAACGCTCTAAGTATGGAGCTGTTAGCAT  
 CCGCCAGACCAAAGTGTTCATGTCGATGATGCTGGTATTGTTACCGCGGCTCTAGAGCGGTTTCCACTCTTTGG  
 AATCAAGCGATCATCTCAGTC



>NIFoxNI

CGACGGTATCGTGATAAATAGTGTAGTTTTACATTTATTTTAGAGTTATTTATGTGAAATAAGTGAATATATGAATTG  
 TGAGTGTAGTGTTAAGTAACTGTGAAGATGATATGTACTTAAGCCCTCCTGACAGTTTCAATCTGCAGGAGATGCTC  
 GATTGTGATATCAAATGTGAGATGGCAGATGGGTTCCGGCTCGACTGCGACCTACCGCCCCCTCGACCTAGAGGATGA  
 ATCACACCACGCGTGGATCCATGGCAACTCGAACTCTAGTTTCGAGTTGGACTTTTTTGGCACCGACTCGAGCGCCTC  
 ACTCATGGTCAATCCGCACGCCATCATGCCCCCTACCCCTCCCTGCAGCACCTCAGCACAAATTCGATCAGCTGATGTCGG  
 CAGTCGATCAGCTGATCTCGGCGGCTGTGACGTCATCAAGGTGCAACTCCCCCTCCACGCCGCCATCACCCGATGATCG  
 GTCTGACCATTGTGATGGGAGACGACGAACCAGCAGAAGAGGAAGAAGAAGAAGACAACGAAGAGGAAGAACC GG  
 AAGACGATGATGATGATGAGGACTACCAGGAAGAGAGGAAGCCAAAGTCGTTGAGAGTGGATCCCCTGAAAGTGT  
 ACTAAGTGCCAGCTCAGTGGCAAGCAAGCAGCTGGCCAGTATCACTGCCAACGCCAACACACCCCCACGGCTCAATC  
 AAGAGTGAGACTGCTGCCAGTCTTACACACCCCCCACCCTACCAAGAGTAAGAGGCTCATCGTGAGTTTCGAGAAA  
 ACAGCTGTGTCTAAATGATGCCAATCTCTATCCGAGCCAGCCTACTCGTATTCGTGTCTTATAGCCTTGGCTTTGAAA  
 AATCCACCGTCTGGAAGTTTACCCGTTTCAGAAATCTACAATTTTATGTGCAAGCACTTTCCGTACTTCAAGTCGGCGC  
 CGAACGGCTGGAAGAATTCGGTGCGCCACAACCTGTCGCTCAACAAGTGCTTCGAGAAGAACGAGAAGCCGATGGC  
 GGGCGGTGAGGGGGCCGGAGGGGGGTACAGCGAAAAGGCTGTCTGTGGGCGATGAACCGCACCGGCTGGCCAA  
 GATGGACGACGAGTGGCCAAGTGGTCGCGCAAGGATCCGTTGGCGATACGCCGGTCTATGCTCAATCCAGATGACC  
 TGGAGTCGCTGGAACGAGGAGATTTGCACGTGGTCTGGATACCCGGTGACGGGTGTGGGGAGGGAGATGACTCGAC  
 AGGGGAGGACCAAGATGGCGGCGCTCGTGACCCCCAATGGCGGCCACTGCTCCCCCGCCACCGCCCCCGCAGTGC  
 AGCCGCAGCCCAAAGTGGCGCCAATCAGGATTAGGACGGTAGCGGCCAAAGTTAGACCGCAACCTACCGCAACTAG  
 CACAGTAACCGCCACAACCGCAGCTGAGGTTCTAAGACAAGAAGTGGTTCACCAGCCATCACACGTAGTGAACAC  
 GAAGTGGTGGAACACCACGATTACGAAGAGGAAGAGGAGGAAGCGGAGGAGGAGGAGGATCAAGATGAGGATGA  
 GGACGAAGAGGAGGAGGAAGAGGAAGAAGAAGAGGACGAGGAAGAGGAGGAGGAGGAGGATGATGGGCCTCAG  
 CCGATTGGGAGTGATGAGAGTGAGGATGAGTTGAGCATGATGCCCCCTCCCTGCAGCCTTTTCGAGCCCAGGTTGGC  
 GCTGGCCAAGAAGTTCACCGAAGCTCAGAAGGAGTTGAGGTTAGGTAGCGGTGGGCAGCAGCATGATATCGAGTTG  
 ACAAAACGACATCCTTGAATCACTGAACTGGGTGGATCTTCCGCGCTACGAGTCGCCCGGCTCCAGGTGCTGGACGT  
 GACCGTGCTGTCTCCGACTACTCGGACGTGTACGCGGCGAATGTGCGAACGATCGCGAACGTGCGAACAAATCGCCA  
 CCGCCCCCGGCGTGGTCGCGCCTCCCGCAAGCGTCCCGCCCCCACACGCATACAGGCAACTACGCTCTGTGTTAAG  
 CGCAAACCTGCCTCAGGTTAAGTGAATCTCTTAAAGATTAAAGAGGGTCTAGCGTTTTACCGATGCAACAGT  
 TGATCGGTATGTGAAGTGAACGAATACTAAGTTTTATGTATTCTAATCTACTTTTTGTTTTAAGTTGTAAGAGGGTCT  
 AGCGTTTTACCGATGCAACAAATGGTCGGTATGTGAAGTG

>NIFoxN2

TGTGATTGCTGCTAATGTGTGTTCAATACCGGATAGGATTAACCTAAAAACAAGTGACATGACACAAAAATGATTGCAT  
GGACTCCAAACGTGAGGACGTCAAGCTGAAGGAGATGAGGATGGCCCTGACCGTGTATGTGACGACGAGGGCCCC  
TGTGCCCTAGGGGGAGGCGCGCCCCAGGGGTGGTGGCGGGGGTGCCATCAGCCCCCTCACCCGGTGGCGCTCAT  
CACTTCGGCCGCCCTGCACCTGCAGATGAAGGAGGGTGAGGAGGGCGGGCTCCCTCTCTCTCACCATCACCCACCG  
AGCAAAAGGGGGGAACCGAAGATGATGACCTAACCTCGTTGAGCTGGTTGCTACAGGATAAGAATATTTTGAAAGG  
TATAAATCTGCGAACAGCTCCGTCCGGAGTGCAAGGAATCACCGACTAGCGAGGACAGTGCTAGTGAACAGGGGGAG  
GTGGCCGAGGGGGGAAGGAGATTCCACATGTTCCAGTGTCAACTCGTCGAGTCCTGTGCCTCCAGTGAGGGGGCTGG  
TGGAGGTGGAGGAGGAGGAGGGGATAGAGAGAGAGTATTAGGAGTGACGAACGTGTGCATGAAGAACAAGCA  
TCCTCATCACATACCTACGATCCCAAAGTCCATATAACGAGCAAGCGCCCTACTCGTTCTCGTGCCCTCATCTTCAT  
GGCGATCGAGGACTCACCCGTGAAGGGCTGCTGTGAAGGAGATCTACGCTGGATCCTCGATCACTTCCCTACT  
ACAAGAACGCGCCACCGGCTGGAAGAAGTCAAGTCCGCTCAACCTGTCTCTCAACAAGTGCTCTGCAAAGTCGA  
AAAGGCACCTAACCTAGGCAAGGGCTCTCTATGGATGGTGGACCCAGTGTACAGGCCTAACCTGGTGCAAGCCCTTA  
AGAAAGCACCCCTACACCCGTATGCTGTACGGGTTCTGGCTCGGATCGGTCCACACCCACCAGCAACTCTCAGCAA  
CCTGACAGTTTATCGTCAGGCGAGCACACCCGACGACACGCTGCACAGTCGAAGGCTGGCAGTAACGGTCCGGC  
TACTGCCCGACCTGACCTGTTCCCTACCTGAGCGGGGGCTGCTAGCAGCAGCTGCGGTGGCCGCGGTCTCCGCCG  
ACTGCCGCTTTGACGCGGACGCGGAAGCGGAAGCGGAAGACGACGGATCCAACCTCGAGTCCGCTGGACGATGTGGA  
CGCGGCCCGCCCATGTTGGCACTCAAACACGGCCCGCATGTGCGCATGAGCATGGAGCAGCGGAAGACGAGTAC  
CACAAACAGTTGACGGCTGTCAATCTAACTTCCAAAACAAAAAGAAGAGCAAAGAAGAGGAGGAGAAAGACGTG  
CTGATAACATCGTGTCCGAGTGCTGACCACACCTACAGCGTGGAGCACACACAGGCGCTTCACACCGACATGTACAC  
GCACAGGTTCCACAGCCCATCCAAGAAAGATCTAATCTCGCCTGAGAAATCCTTCACTGACAGCCAAAGACTCCAATT  
CAAGTTGGGCGATGCGAGCAGTTGCGCGGGCGAACGGCCATCGCAGTTCACTGGGCGATCAGGAGGAAGTGGCAA  
GATAGCCGAGGGCGCCGACGCACTTTTGAATTTGGCGGGCTTTACCACAGTCTGCGCAGTCGATCACGAGCTCCA  
CTGCGCACCGAGCCAAACGACAACGTCTAGAGGAGGAGGAGGAGGAGGCGTTGGTGACGAGGAGGAGGAGGGTC  
GGATGCAGGTGGAGGAGGTGCAGGAGGTGGTGGAGCGAGTTCCTTCAGGCCACGGCTGTTGAGGAAAAGTCCGCT  
GAAACGCGACTTGAAGAGCGAGAGACGCGAGGAACGAAAACAGCGCGAGAAAAAGGCCTGCATGAAAGTGTGGA  
CTACGCGCAGGCCATCATGGATTCAATGAACGAGACCAACAACAACAACAGCAGACTGCGTCAAAGTCGGCCGAC  
GACAAAGTGGTGGTGCACAAAGTGGTACCACCACCAACCGATGACAAAGTGGTGTCTTCTTCCACATCTCACCG  
CGGCGACAAAGCGAGACGAAAGTCGTGTTGACCCCGTCAAGCACTTGGCCGCCAAAGTGAAAGGATAGGACC  
GGTTTCCGGGGGTCGAGTTGTGCGCCTCTATCTTGGCGCCTTCTCGTAGTAAATTAACGTAAATAACTAGTGAAGTA  
GTGTGTTTTGTGTACATTGTTGCAGTGGTAGGTT



>*NIFoxO*

AGAGATGTCCGAGTGAGAGGATTGATAAGTTTGCAGACTTGGAAAGTAATCTTGATAGGTTTTTGGTGTGAAATGA  
 TGGAAACCGTTGACCGACCTGGGCTTCGAGCCCCAACAGCGTGCCAGATCAAACACTTGGCCCCCTCCACGACCCGAT  
 GACGTACCCGGGGCAGAGACAGGGGGCGCCCCGGGACTGATGGGGGCCGTTGTGCCCCCTGCAGCTGCTGCAGCCC  
 AACTCAAGAAGAACTCGAGTCGTCGCAACGCGTGGGGCAATCTGTCTACGCTGACCTCATCCTCAGGCGATCGCG  
 TCCGCGCCCGACAAACGACTCACCTTGTTCGAGATCTACGAGTGGATGGTGCAGAAATGTGCCCTATTCAAGGACAA  
 GGGCGACAGCAATAGCTCTGCTGGATGGAAGAACTCGATCAGACACAACCTATCGCTGCACAACCGGTTTCATGCGC  
 GTACAGAACGAGGGCACGGGGAAGTCGTCGTGGTGGATGATCAACCCGGACGCCAAGCCGGGCAAATCAGCTCGCC  
 GTCGAGCCACCTCCATGGAGACGTCCAAGTTCGAGAAGCGGCGAGGCCGAGTCAAGAAGAAGGTGGAGGCGCTGA  
 GGAACGGACTCGACGCGACTCCTAGTCCCAGTTCATCCATTTCGAGAGCCTTGATCTGTTCCCTGAATCGCCGCTGC  
 CTGGCTTCCAATAAGTCCCGACTTCCGACCCCGAGCGTCGTCGAACGCATCGAGCTGCGGACGCCTGTCGCCGATT  
 CGGCCGTCGAGACGGACTGGACGTCCTACAGCTACAACCCGGAACAACCTGGCCGGCAGTCTCGAACAACGATGCG  
 CCTGGGGGTTCCCGCCACCGAGGCCTCCGTTGCGCCACCCAGTTCATGTACCCACACCGCCCCCTATCACCAGCC  
 CCCCTACCATTCCTACACCCCCCAGCAGCCCCCGCCCCACCACTGTCCAATACACAACACCAGTCCACAGCAGCCCT  
 GCGCTGTAAACCACCAAACTCCCAAACAGAGCATCTACCGTCGTACCCGCGAGTACCGAGCCCCAGTCCGCGG  
 GCAACAACGGTGATGGGTCAGCTGATGGGCGCCCTCAACCCGTCCCTTATCGACGACCTCAACCTCAACATAGAGAC  
 GTTCGACGGATTGACTGCAACGTCGACGAGGTCATCAAGCACGAGCTCAGCATGGAGGGCAGCCTCGACTTCAACT  
 TCACGCAGCAGCTGCAGCTGCAACAACAGCAACAACAGCTGCAACTGCAACAACAGCAGGATCCGGCCACCGCTAG  
 CCAGCCGCTGTCTACTCCGGCCAGTCCCTGGGTTCAATAGCGGTACGTCAATGGTAATCGAACACTACGTGGAATCA  
 ATTGCAAGGATTTCAATTATTACTCCGGTTATCCAAATCGTTTGGAAAGACCATAATGCTCAGAT

>NIFXPY

GCAGCATAGTATTGGTCTG CAGCCAGCTGCGGCCGTTTTACAGCAGCATGCCAAGATGCAGCATATAGCTGGAGGGT  
TAGCCCAGGCGGAGATGGTATCGTTATGGAATAACTTTCAAGTTGATGGAACGGACCTGGACCAGAAGCAAATCGAC  
AAAACAACGGCTGGTTAAACGGAATACTAGCTTCAATGGGTATAGGAAGAAGAGGAGCTG GTGGAGGAGGAGACT  
GTTTAAATGGTGGCAGTGGCAGTACACCTCAGGAGGACACCAGCAGTTGTGCAGATGCCAACCCAAGCTCCACCAAT  
AAAGTCCACCTACTCTTTGGTCACGGAGTATGCAAATGGCCCGGCTGTGAAACCGTCTGTGATGATATACAAGCATT  
TTCAAGCACTTGAATAAGGAGCACAACCTAGATGATAGATCAACGGCACAAGCTAGAGTGCAGATGCAAGTTGTCTC  
GCAACTCGAACTTCAACTGCAGAAGGAGCGGGATCGACTACAAGCCATGATGCTACATCTCCACATGTCCAAGCAA  
CAGAGTAACGTTGCTGCCATTGAACATGACAAGGATCCATCTAAAGCTCTATGTTTATCGAAGTTGAGTTCACCTCCA  
CCTCCAGCTTACCTCACACAAGGTCAGTCTTGTCTATCAGCGAATAACTCGATAGCCCAAGGCGGTACCCCAGGTCTT  
GGACCTGGACCTGGAACCTGGACCTGGACCTGGGCCTGGACCATTGCCAGTTTCAGTCAGATCACCCGTGTCTTCCCTT  
CGTCCATCAACACCTAGCCTCACCGTTCCTTCAAACGAAGAATATGTGAGAAGTCAGCATTATCATTGGCTGGAGG  
ATTACCATACATGTTGGAACGTGCTGTTTGGATGTTCAACAGGAAATCCAAAGGAACCGTGAATTTTACAAGAATG  
CTGATGTCAGACCTCCATTTACCTACGCTTCTCTTATCCGTACGTGATAATAGAGTCACCTGACAAACAGCTAACGC  
TCAATGAAATCTACAACCTGGTTTCAAAATACATTCTGCTACTTCAGAAGGAACGCAGCAACATGGAAGAATGCAGTG  
CGCCACAACCTGTCTCTACACAAATGTTTCATGCGTGTGGAGAACGTGAAAGGCGCTGTGTGGACTGTGGACGAGGT  
CGAGTTTTACAAACGGAGGCCACAGCGTTGCGTACCAGGGGATGCTCAATCCGAAGAAAGCTTATCATTGGGGAAA  
AATCCGAGAGTTTTTGCAGACTCAATAATTGCCAACATTCAGGCACCGATGGGAGAGAATGCCTTTCCACAATACAT  
CAGTACAACCTCCTCCGCCACCACTACCTCCACCACTCAGGCCAGACAGTGGACCATCCTCACCTTCACCAAAAAAGC  
TCAGGTTATCTCAAGAAGAGGAATTGCTCCGTCTTCAGCAAGAGAATGGGACCCATCCGTATCATCATCAGCAGCAG  
CAACATCACCATCTTCAACAACAGGAGGAAAATGATCAAGAAGAAGTAGCTGAGGATTTGTCAATGGCACCTGAGG  
AATCTCCAGCTGATCACAATGGAGCTGAATCGTAA CAGTGGGGCGTCAGTTGAAATTTATGTAAAAACAACCTTTCT  
ATCATATTAATACTCTGTAAATATTACACCTGTAAATAGATGGAGATCAAATTCCATCAGCTAAATAAATAATTGTGAC  
AACTCGGTAGG

>*NFOXQY*

TGAAGGAGGAGAAGAAGGAAGGAAAAGAAAAATAATAATAATGCTAGGCCAGCCTGGAGGAAATAATGGAGAGAA  
CAACCAGACTGGTAGTCACCAACAGCCAAGTCCGACTGGGAGAGGTCCTCAAGCGCCCAGTCTTCCTATGTTGCAGC  
CATTGGACCACTATCGGCTGCAGCTCTACAACATATGCAGTGCAAGCTGAGCGACTAAGATGTCAGCAGTTTATCAGTC  
CTGGTGGAGCCGGGTCCCAATACCCAGGTACAGCCTCAGCTTTGTGTCCACCCTACCCGGCCACAGCAGCCTACCAT  
CCCAGGCTGGCACTGTCAATGTCCCTCTTCCATCACCGCGTATTCCAGCCAGAGGAGCCCCAAACCACAGTACAGCTA  
CATTGGATTAATAGCAATGGCCATTCTATCATCCCCTGACCATAAACTGGTTCTCTCCGATATCTATCAGTATATTCTG  
GACAACTATCCCTACTTCCGCACCCGGGGACCAGGTTGGAGGAACTCTATCCGTCACAACCTCTCTCTAAATGATTGT  
TTTGTGAAAGCAGGAAGAAGTGCCAATGGAAGGACACTATTGGGCGATACATCCGGCAAATGTAGATGATTTC  
AGAAGGGGGACTTTAGGCGGAGGAAAGCGCAGCGAAAAGTGAGGAAACACATGGGTTTGGCTGTAGAGGATGATG  
GAAATGACTCGAGCAGTCCACCACCTCCTCCATTGTCACCGACACCAGTTGGAACGATCTGGACTCCAGCGACGGTT  
TTCCCCACAGCATTCCACCATCACCAACCTACCACCACCAAAACCAACCATCACCAACCATCATCACAACCATCACAC  
AGATGTCAGCCTCACATCAGTCACTCTAAACAACATGGTTGGCCGAAAACGGCAGTTTGATGTTGCATCCTTACTGGC  
TCCAGATGATGTTTCTGAGCAAATTTTACCTCTCCAGGAAAGAAAAATTACTGCGAAAGATCTTCCTATAAAAGGGG  
AACCAGCTTGACGATGCTTAGATGCTGAACAGAGCTTGACATGGAATCCGCTCCTGAAGATGGGTGATCATCA  
AAAAGGAAAAAAGTCTACAGCAGTGATGAAGATGCAGATGTGAGCAGTGAGGAAGTTGATGTGGTCTCTCACATTG  
CTCCAATGATAGCAATCGTCACCCTAGACCAACTCCCCTACATCACAGTATAGCATCTTCACCAGCTTGGCCCCCTGC  
CACTACCAGCAGTAACCTACCAGAACAGCTGTTTCAATCCCTCCATTGTTCCAGCACACATGGATCAGCATACAAAC  
AGCTTGGTTGCTAGGTACTACCAGACTGCAGCCAGGCGATTGCAATGCACAGACATCTGAACAATAGTAATAGTTT  
TAGTGCTTACAATGATGATAATAATGGTAACGCGAATAGTAGTTGTAAGGATGATCAAGCAAGGGTGTACCAACAG  
CACTTGAAGAAGACAATGTTTGAAGAAAAGCTGGCATGAATGTGTATGTCAACCGTGA



>*NlFox17*

ACGCAAGTAAGAGTTCCAA CGTGCTAGTTTTGATTTGATAGATGATTAGTTCAAACACCACACTACAGGAGAAGGAC  
 ACACTGCCGGCTGGTTGTGCATC ATG ATTGGACCCAATGTAATCACACTAGGAGGGAGTTGGCCCCGAGTGTCAAACC  
 ACGGGTACTAAGGTCATCTCACAAAAACGGAGATGTGACGACGAGGGAACAGAGTGTCAAGATGGCGGCAGTGCA  
 GAAATGGTTTTGGTGAAGAAAAGACGCTACAAGAGGACATGTTCCGATGCTGAGAACAAAGGCTCCTAAGGTCGGCA  
 GAGGAGTTGCTGTGGCTACAAAAACCATCAACAACAATCTGATTATCAATCAGGATAATGATCGGATCATCAGTGAT  
 GAAACAGTGTTGATCATCGATGCCAATTTTGGATGTACCAGAGCTTCCAGTGCTAGCAGCATCAGTCCAACCAATACT  
 GAAACCATCAGCAGTTTTTCTGACTCGATGCCATCATTGGAGGAAATCTACCCTGTCACCATTGGTGCAGAGTCTCAG  
 CCAATAAGGAGTGCCGCTCCTCAAACCGGAAGTGCTCCCATCCAGGCCGGAAGAGTATCTCCACCGCAACTAGAGG  
 CAGTTGACAATCCCAATCTGTCTATGGCTACTCGACTTCAAGGTGTCTACTGTTTGATCCCGATGGCAGTGAGGGCA  
 ATGTAGATGGATGCCTCCAAGGAGACGAGTGTCTACAGACGAGCTCTACGTATCATCATCACCATCACCAGCAATCA  
 TCATTGACAATGCCTCCTCC CCTCCCGCTGCCCCGTGTCT CAC T CCCCCAACAGCAATCGCTCCTAAACCGCCCTAC  
ACCTACACAGAGCTCATAGAACAGGCACTCAACGAGAAGGGCCAACTCACAGTCTCCGGAATCTACACATGGATGT  
CAGAGAAATATCCGTTTTTCAAAGCCACGACGAACGATGGAAGAACTCGGTACGGCACAATCTGAGTATTAATCCA  
CATTTTCGAAAAGGTATGAAGGCGTCTCAAGGATCCGGTCACTTTTGGACTTTGAGCACTCAAGGGGCTCCCCCTCCC  
CCTCTTCATCCCAATCATGACACCTGGAAAATGACGGAAGTGAAAAGTGTGATTGAGACTGAGAGTGACGAGACTG  
 AGAAATCGTACATT GATGAGGTTGCCACGGCCACA GCCAGCATCGAGGA GCCTTCCTCTGGACTGG AGGACCCGTT  
 TCACCCCCCTCTCCATCACTATTCTGCGGACAACCTGCCTGATCCCAGCCTAGCCAGAACTGCCGAAGAAATCCTG  
 TCAGGGGTCA AGAAAGAGGTCCAAGTGC AGTATCTTTCGGCCGATTCTGACTTTTTAAATCAAATGACGAGAGGCGA  
 ACTTGACAGATGAAACAAATCTAACAGAAGTTTCAACATCTTTTCTAATGAACGATTTGGGAACTGAAGTTATTTGAA  
 TGACAGTTTTTTCTGTGACGATCTCAATTTCCAGTACTGCGAGCTCACTACTGCTCAGATG TGA TCAGAATATCAGTCA  
 GGATTGAAGTTTTATTATGGAAATTCCTAGATATAGTTTTTGAATTGAGCAATCAAAGATGAT TGTGATGGAATTGATG  
AGGA T

**Figure S1.** The cDNA sequences of 18 BPH Fox genes were listed below. The initiators and terminators were boxed. The primers used for cloning, qRT-PCR, RNAi were highlighted in blue, red and yellow, respectively. The primers used for RNAi targeting the second non-overlapping region were highlighted in green. The sequences of FHD were underlined.

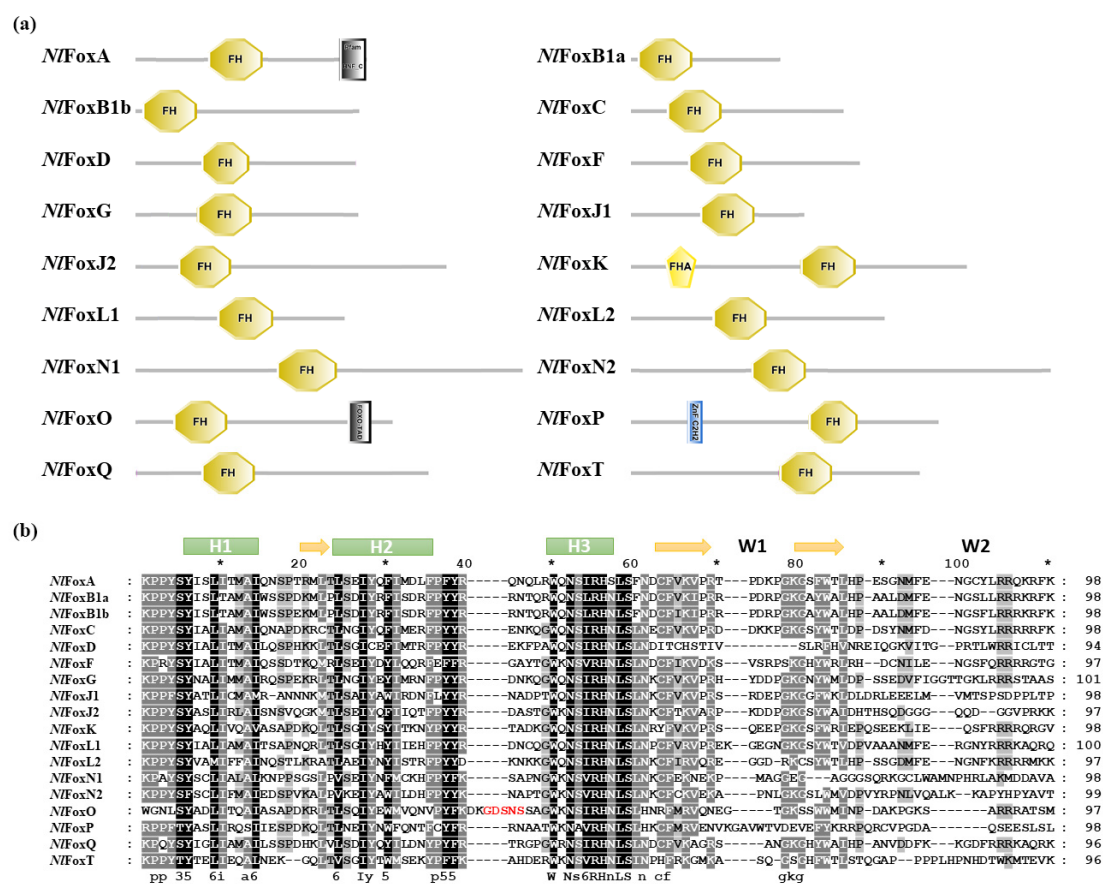

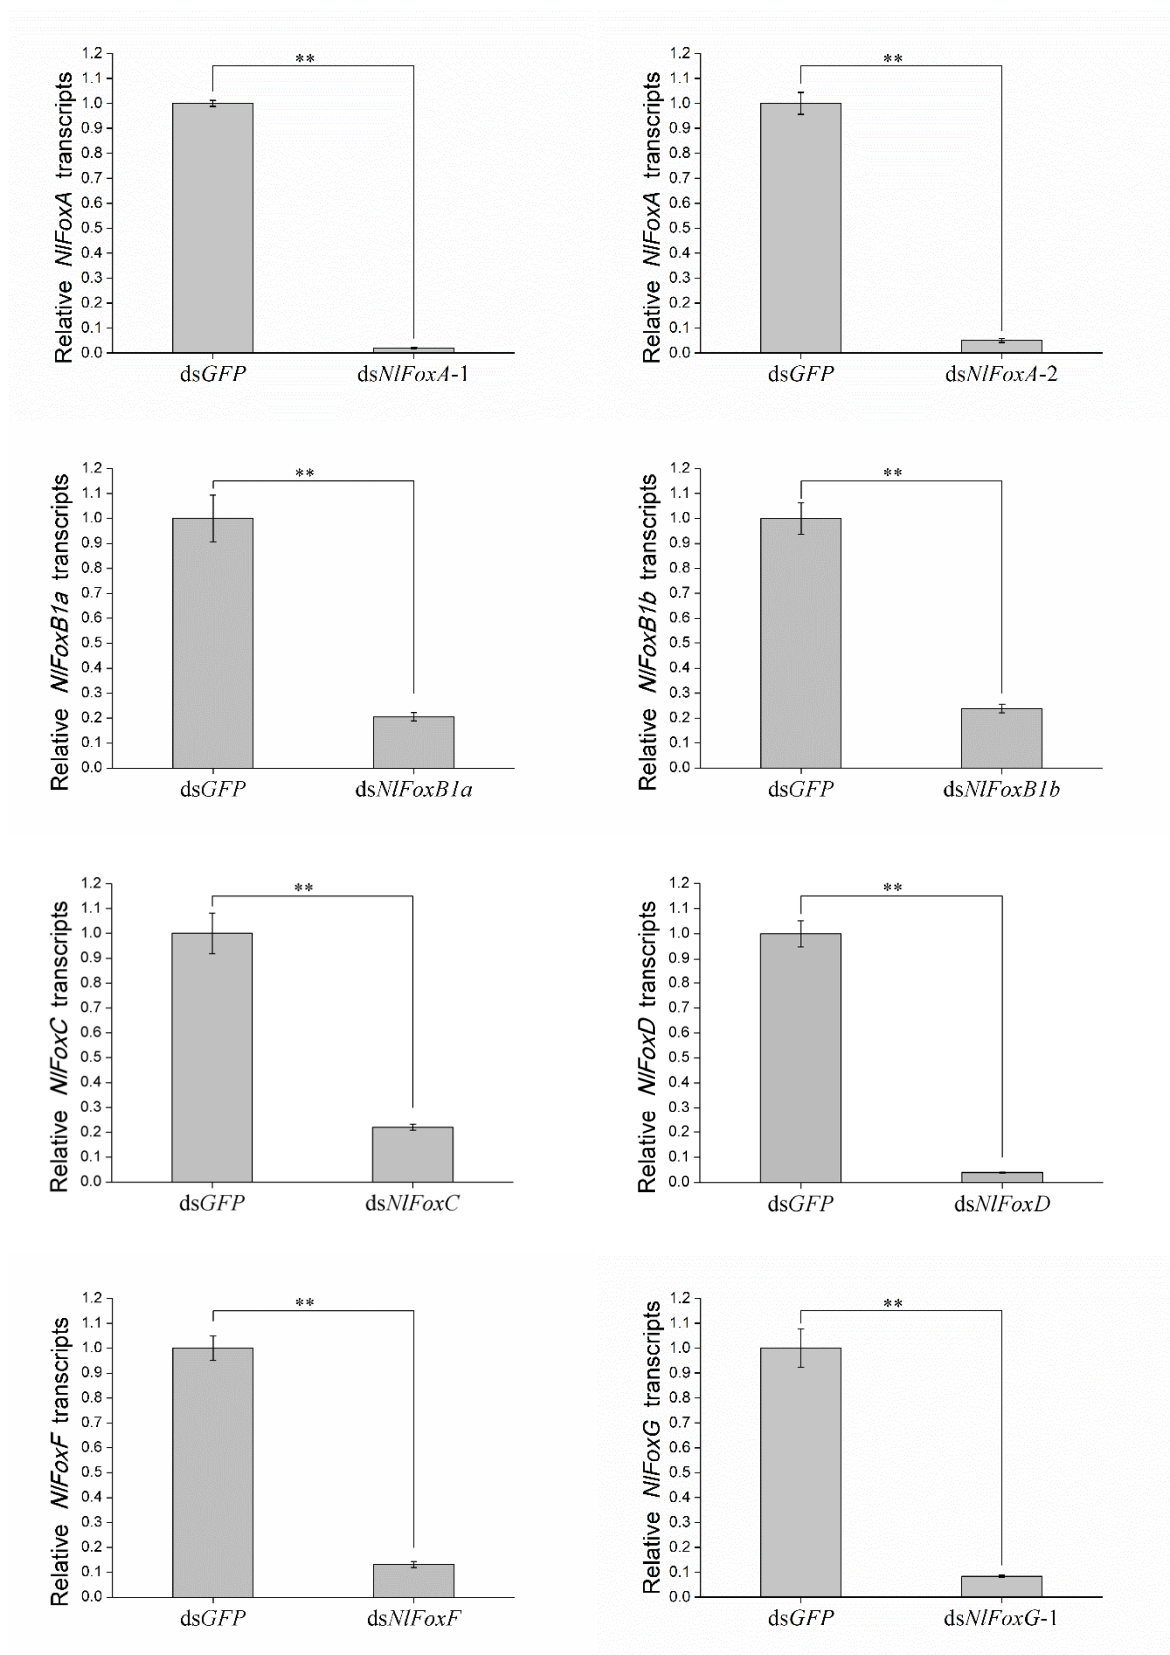



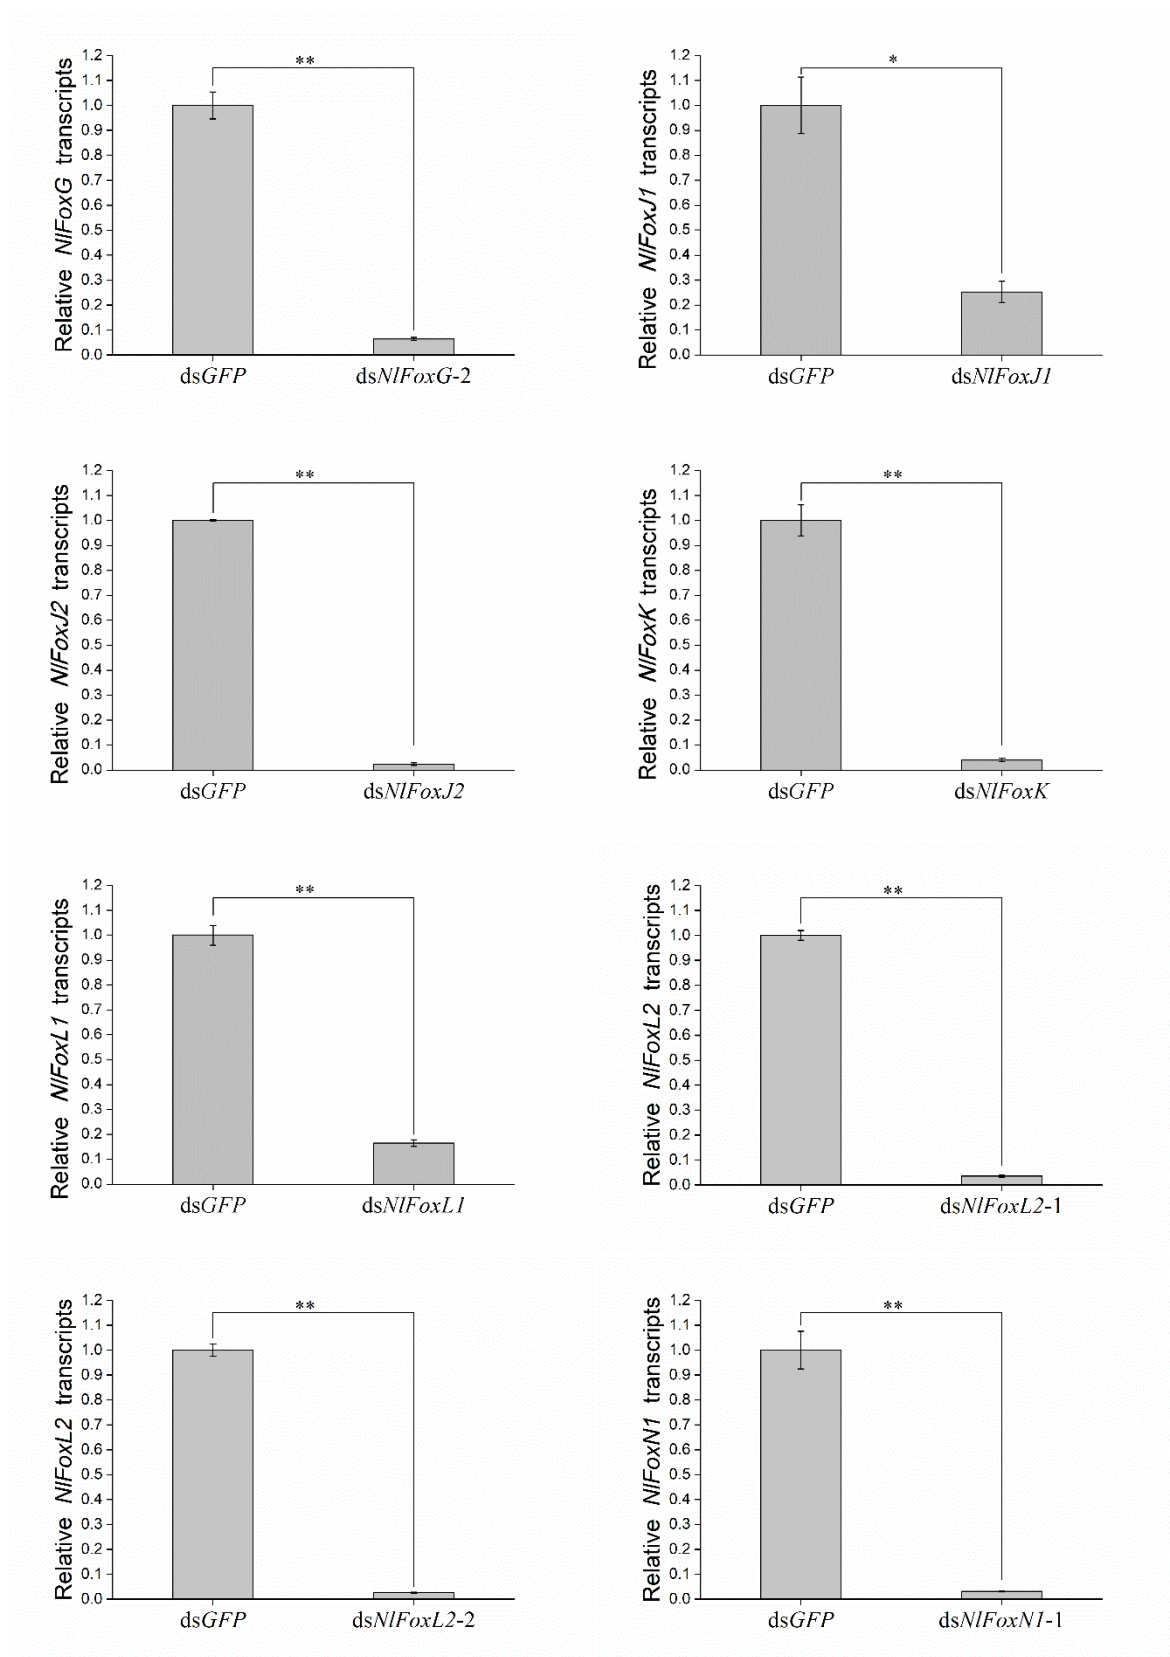

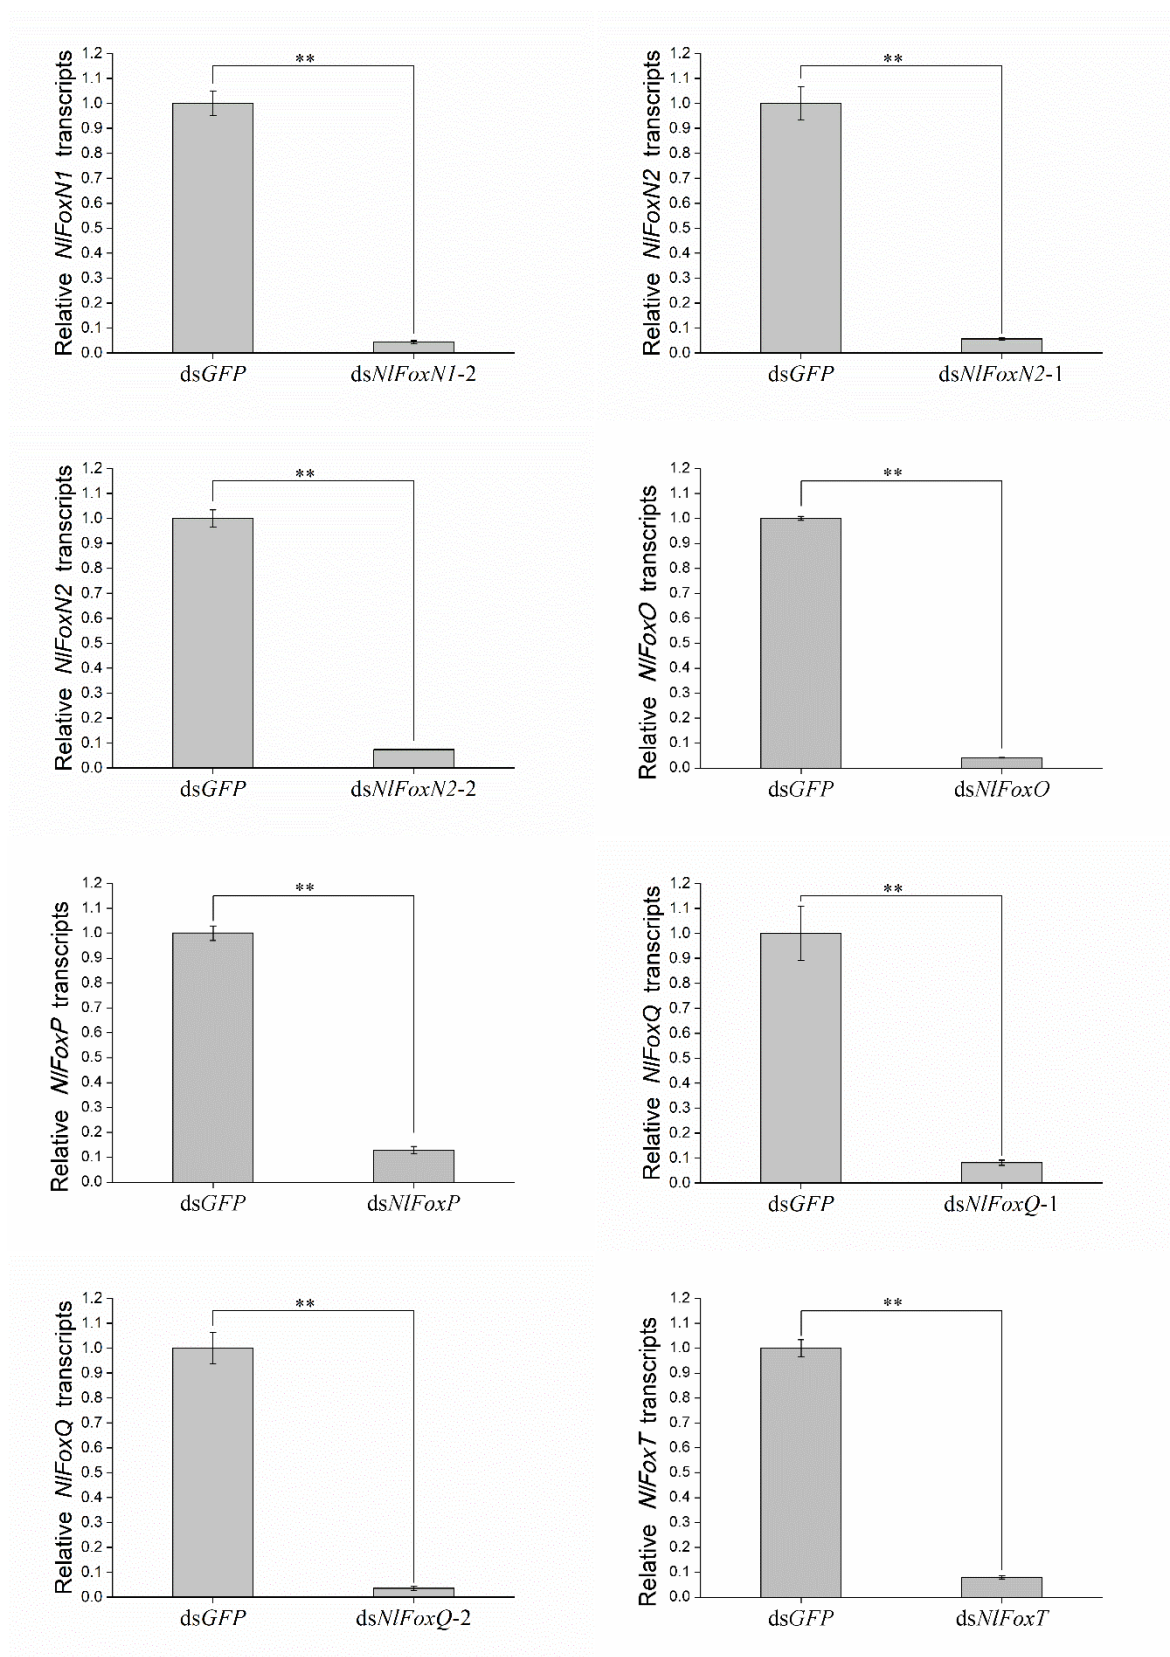

**Figure S3.** RNAi efficiency by was determined by qRT-PCR. dsRNA (50 ng per insect;  $n = 100$ ) was injected into BPHs at the very beginning of newly emerged adults. Total RNA samples for *NIfoxA*, *NIfoxJ2*, *NIfoxK*, *NIfoxN1*, *NIfoxN2* and *NIfoxO* were extracted from eggs within 2h after laid. Total RNA samples for *NIfoxD*, *NIfoxG* and *NIfoxQ* were extracted from eggs 48h after laid. Total RNA samples for *NIfoxB1a*, *NIfoxC*, *NIfoxF*, *NIfoxJ1* and *NIfoxL1* were extracted from eggs 72h after laid. Total RNA samples for *NIfoxB1b* and *NIfoxP* were extracted from eggs 96h after laid. Total RNA sample for *NIfoxL2* and *NIfoxT* were extracted from BPHs 3 days after injection. dsGFP was injected as negative control for the nonspecific effects of dsRNA. *NI18S* was used as an internal control gene. Mean  $\pm$  s.e.m. from three experiments. \* $P < 0.05$ , \*\* $P < 0.01$  (Student's *t*-test), difference from dsGFP.



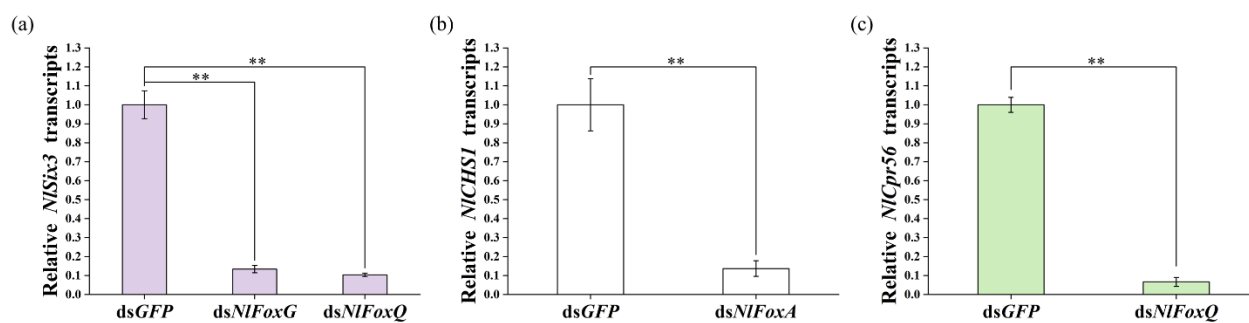

**Figure S4.** (a) Knockdown of *NIFoxG* or *NIFoxQ* both decreased expression levels of *NISix3* in the eggs; (b) Knockdown of *NIFoxA* decreased expression levels of *NICH51* in the nymphs; (c) Knockdown of *NIFoxQ* decreased expression levels of cuticular protein genes in the nymphs. dsRNA for a (50 ng per insect;  $n = 100$ ) was injected into newly emerged female adults (within two hours). Total RNA samples were extracted from eggs 48 h after laid. dsRNA for b-c (50 ng per insect;  $n = 100$ ) was injected into BPHs at the very beginning of the 4<sup>th</sup> instar. Total RNA samples were extracted from BPHs 3 days after injection. dsGFP was injected as negative control for the nonspecific effects of dsRNA. Mean  $\pm$  s.e.m. from three experiments.  $^{***}P < 0.01$  (Student's *t*-test), difference from dsGFP.

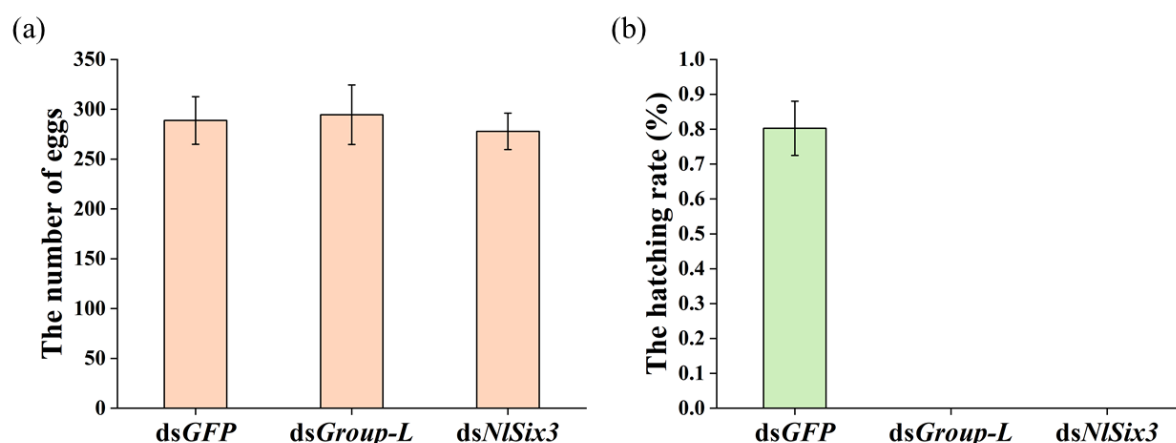

**Figure S5.** Knockdown of *Group-Late* or *NISix3* prevented the hatchability. (a) The number of eggs; (b) The hatching rate. dsRNA (50 ng per insect;  $n = 100$ ) was injected into newly emerged female adults (within two hours). dsGFP was injected as negative control for the nonspecific effects of dsRNA. Mean  $\pm$  standard error of the mean (s.e.m.) from three experiments.

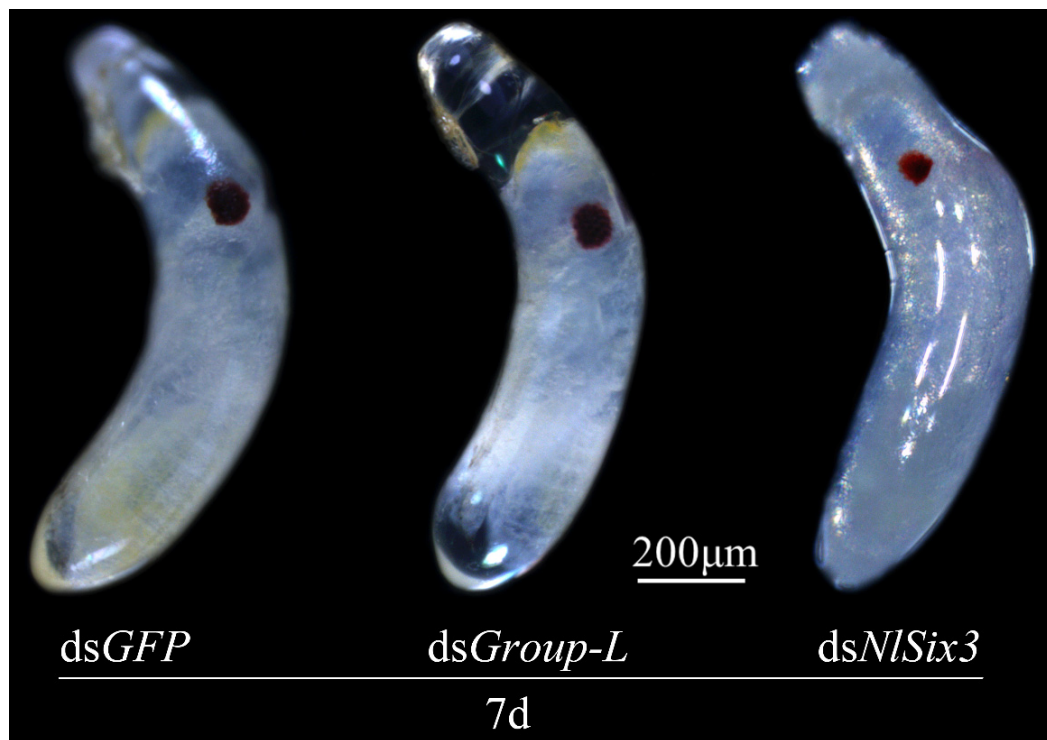

**Figure S6.** Lethal phenotypes of eggs injected with dsRNA for *Group-Late* or *NISix3*. dsRNA (50 ng per insect;  $n = 100$ ) was injected into newly emerged female adults (within two hours). *dsGFP* was injected as negative control for the non-specific effects of dsRNA.
